# Supplementary material
Source: MDPI journal article supplement (https://www.mdpi.com/2076-3417/10/6/2136)
Supplement: s1 [file s1]

Article

In Search for the Missing Nitrogen: Closing
the Budget to Assess the Role of Denitrification
in Agricultural Watersheds

Giuseppe Castaldelli, Fabio Vincenzi, Elisa Anna Fano and Elisa Soana *

Department of Life Sciences and Biotechnology, University of Ferrara, Via L. Borsari 46, 44121 Ferrara, Italy; ctg@unife.it (G.C.); fabio.vincenzi@unife.it (F.V.); fne@unife.it (E.A.F.)

***** Correspondence: elisa.soana@unife.it

Received: date; Accepted: date; Published: date

**Supplementary Materials**

**Table S1.** Livestock categories, live weights, and N excretion rates.

| **Category** | **Sub-category** | **Live weight (kg)** | **N excretion rate**  **(kg N t-1 live weight y-1)** |
| --- | --- | --- | --- |
| Cattle | cattle <1 year | 220 | 67 |
|  | cattle 1-2 year: males | 350 | 84 |
|  | cattle1-2 year: females | 300 | 120 |
|  | cattle >2 years: males for reproduction | 800 | 84 |
|  | cattle >2 years: heifers for breeding | 600 | 120 |
|  | cattle >2 years: heifers for slaughtering | 600 | 84 |
|  | cattle >2 years: dairy cows | 600 | 138 |
|  | cattle >2 years: cows for meat and/or work | 600 | 120 |
| Buffaloes | buffalo calves | 200 | 67 |
|  | famale buffaloes | 600 | 138 |
|  | other buffaloes | 300 | 84 |
| Equidae | horses | 350 | 69 |
|  | other (donkeys and mules) | 200 | 69 |
| Goats | goats | 50 | 99 |
|  | other goats | 25 | 99 |
| Sheeps | breeding females: dairy sheeps | 60 | 99 |
|  | breeding females: other sheeps | 50 | 99 |
|  | other sheeps | 35 | 99 |
| Pigs | piglets < 20 kg | 15 | 110 |
|  | pigs 20-50 kg | 40 | 110 |
|  | pigs for fattening 50- 80 kg | 65 | 110 |
|  | pigs for fattening 80- 110 kg | 95 | 110 |
|  | pigs for fattening >110 kg | 120 | 110 |
|  | males for reproduction | 250 | 110 |
|  | sows | 180 | 101 |
| Poultry | broilers | 1 | 250 |
|  | laying hens | 1.9 | 230 |
|  | turkeys | 6.5 | 167 |
| Rabbits | breeding females | 3.5 | 143 |
|  | other rabbits | 1.7 | 143 |

**Table S2.** N fertilization, yield and N uptake coefficient of the harvested portions of the main crops cultivated in the Po di Volano-Sacca di Goro watershed. Yields are reported as average ± standard deviation for the Ferrara province in the 5-year period 2006-2010.

| **Type** | **Crop** | **N fertilization (kg N ha-1)** | **Yield**  **(t ha-1)** | **N uptake coefficient**  **(kg N t-1)** |
| --- | --- | --- | --- | --- |
| Cereals | common wheat and spelt | 170−180 | 5.9 (0.9) | 21.0 |
| durum wheat | 170−200 | 5.4 (0.6) | 22.8 |
| oats, rye and barley | 150−160 | 4.0 (0.5) | 18.6 |
| rice | 50−110 | 5.9 (0.3) | 13.8 |
| grain maize | 220−300 | 8.9 (1.4) | 14.9 |
| sorghum | 100−200 | 7.2 (1.0) | 15.9 |
| other cereals | 150−180 | 3.6 (0.9) | 18.0 |
| Industrial and forage crops | potato | 130−175 | 36.4 (1.8) | 4.2 |
| sugar beet | 90−120 | 59.8 (5.2) | 3.1 |
| rape and turnip rape | 65−100 | 3.6 (0.7) | 33.4 |
| sunflower | 65−100 | 2.7 (0.4) | 28.2 |
| soybean | 70−90 | 4.0 (0.2) | 58.2 |
| alfalfa | 0 | 10.0 (2.5) | 27.0 |
| Fresh Vegetables | tomato | 125−160 | 65.1 (5.0) | 2.6 |
|  | other vegetables | 100−150 | 23.7 (4.9) | 4.9 |
| Fruit trees | vineyard | 90 | 13.9 (0.8) | 2.0 |
| apple-tree | 40 | 31.3 (1.0) | 0.6 |
| peach and apricot-tree | 90 | 15.5 (3.2) | 1.3 |
| pear-tree | 85 | 23.2 (4.0) | 0.6 |
| other fruits | 90 | 13.3 (1.3) | 2.5 |
